# Supplementary material for: Ab initio study of the protic conversion of an allene into an η2-vinyl complex of Re, and on their structure, bonding and redox behaviour †
Source: Royal Society of Chemistry journal article supplement (doi:10.1039/b004143m), 2000-01-01
Supplement: b004143m-1.doc [file b004143m-1.doc]

**ESI - Figure 1**

A molecular orbital diagram for structure **2**.
